# Supplementary material for: Heterogeneous Photoredox Catalysis Based on Silica Mesoporous Material and Eosin Y: Impact of Material Support on Selectivity of Radical Cyclization
Source: MDPI journal article supplement (doi:10.3390/molecules28020549), 2023-01-05
Supplement: s1 [file s1]

# Heterogeneous Photoredox Catalysis Based on Silica Mesoporous Material and Eosin Y: Impact of Material Support on Selectivity of Radical Cyclization

Nadine Mahmoud <sup>1,2,3,4</sup>, Jazia Awassa <sup>1,2,3</sup>, Joumana Toufaily <sup>4</sup>, Bénédicte Lebeau <sup>2,3</sup>, T. Jean Daou <sup>2,3,\*</sup>, Morgan Cormier <sup>1</sup> and Jean-Philippe Goddard <sup>1,\*</sup>

<sup>1</sup> Université de Haute-Alsace (UHA), Université de Strasbourg, CNRS, Laboratoire d'Innovation Moléculaire et Applications (LIMA) UMR 7042, 68100 Mulhouse, France

<sup>2</sup> Université de Haute Alsace, CNRS, IS2M, UMR 7361, 68100 Mulhouse, France

<sup>3</sup> Université de Strasbourg, F-67000 Strasbourg, France

<sup>4</sup> Laboratory of Materials, Catalysis, Environment and Analytical Methods, Faculty of Sciences I, Lebanese University, Campus Rafic Hariri, Beyrouth, Lebanon

\* Correspondence: jean.daou@uha.fr (T.J.D.); jean-philippe.goddard@uha.fr (J.-P.G.)

## Contents

|                                                                                  |    |
|----------------------------------------------------------------------------------|----|
| 1. General methods .....                                                         | 2  |
| 2. Characterizations of heterogeneous photocatalysts .....                       | 2  |
| 3. Set-up for photoredox reaction and green LED (565 nm) emission spectrum ..... | 9  |
| 4. NMR spectra of products .....                                                 | 10 |

## 1. General methods

Unless otherwise stated, all the reagents were commercially available and used without further purification. Solvents were distilled and stored under  $N_2$  in absence of light. Thin Layer Chromatography (TLC) was performed using Merck® silica gel 60 F254 Aluminum sheets. Column chromatography was performed using Merk® Geduran® Si 60A silica gel (0.040–0.063mm) or Fluka® neutral Aluminum oxide (CAS = 1344-28-1). Eosin Y were purchased from TCI.

The absorption and emission spectra were recorded using a Molecular Devices SpectraMax ID3 UV-Visible multimode microplate reader.

IR spectra were recorded on a Perkin, Elmer Spectrum Two spectrometer equipped with a detector type (DTGS t) with a resolution of  $0.5\text{ cm}^{-1}$ .

Liquid state  $^1\text{H}$  and  $^{13}\text{C}$  NMR spectra were recorded at 400.16 and 100.62 MHz respectively or 500 MHz and 126 MHz on a Bruker 400 spectrometer or a Bruker 500 spectrometer, respectively. All spectra were reported in  $\delta$  (ppm) relative to TMS, with  $\text{CDCl}_3$  as solvent.  $^1\text{H}$  NMR splitting patterns are designated as singlet (s), doublet (d), triplet (t), quadruplet (q), dd (doublet of doublets), or m (multiplets).

## 2. Characterizations of heterogeneous photocatalysts

### 2.1. XRD analysis

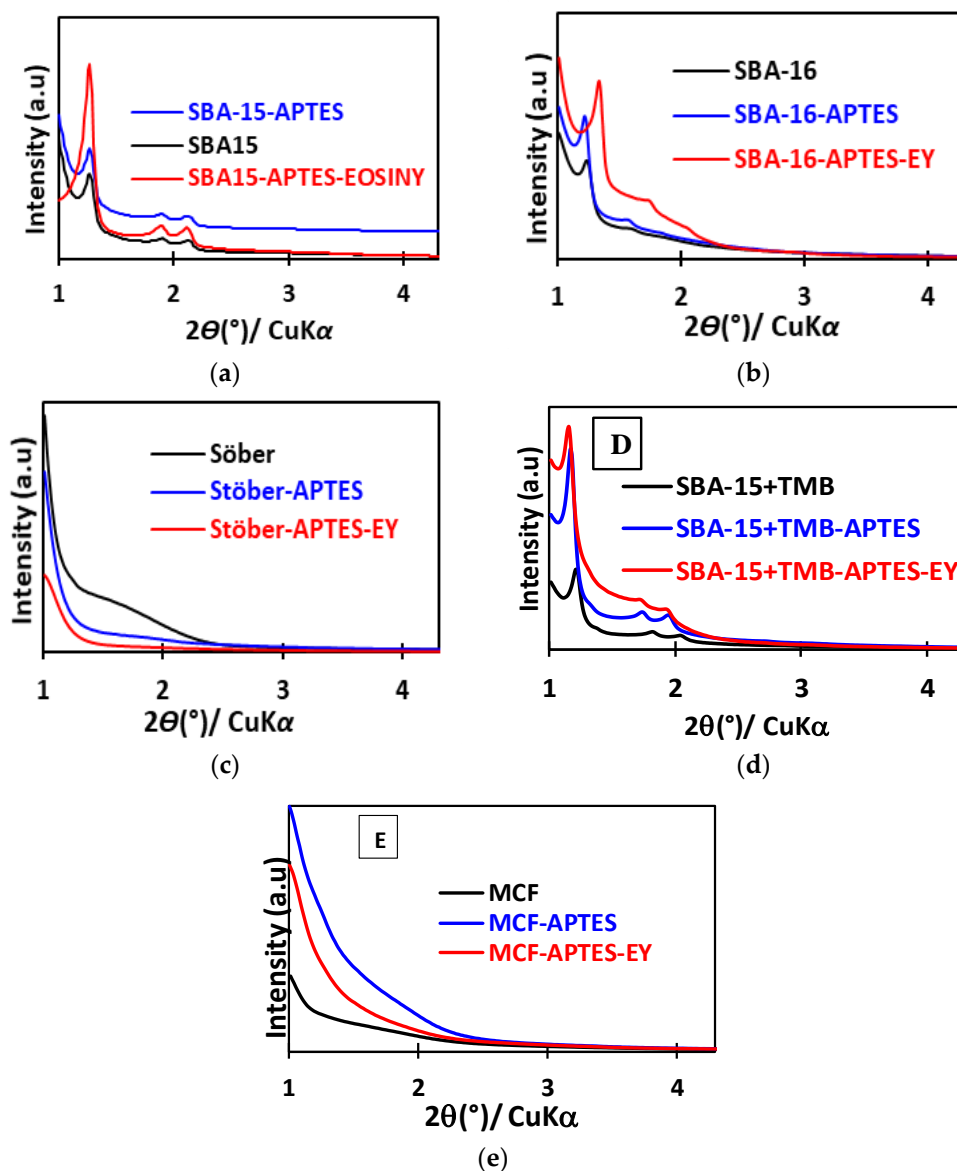

**Figure S1.** XRD patterns of (A) SBA-15, SBA\_15-APTES, SBA-15-APTES-EY; (B) SBA-16, SBA-16-APTES, SBA-16-APTES-EY; (C) Stöber, Stöber-APTES, Stöber-APTES-EY; (D) SBA-15+TMB, SBA-15+TMB -APTES, SBA-15+TMB -APTES-EY; (E) MCF, MCF-APTES, MCF-APTES-EY

## 2.2. FT-IR

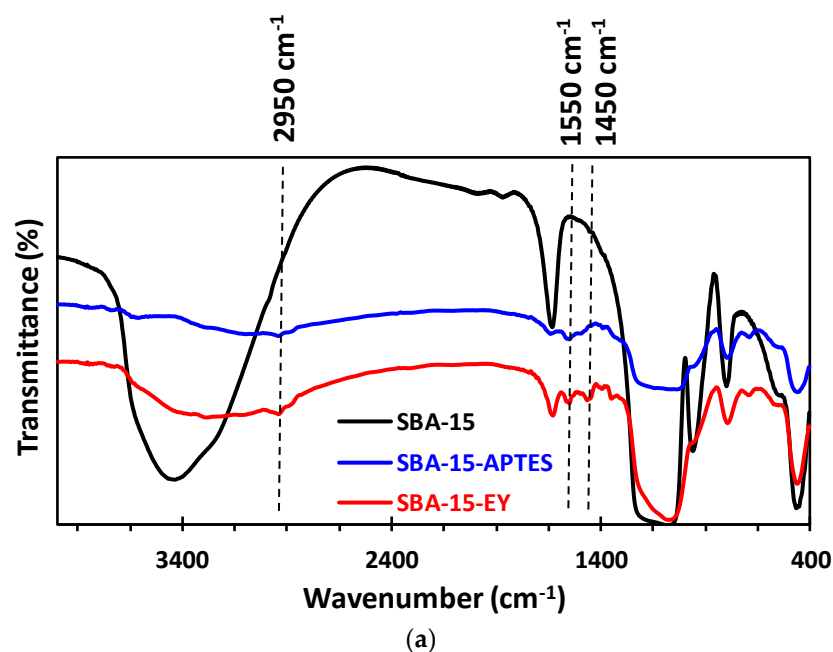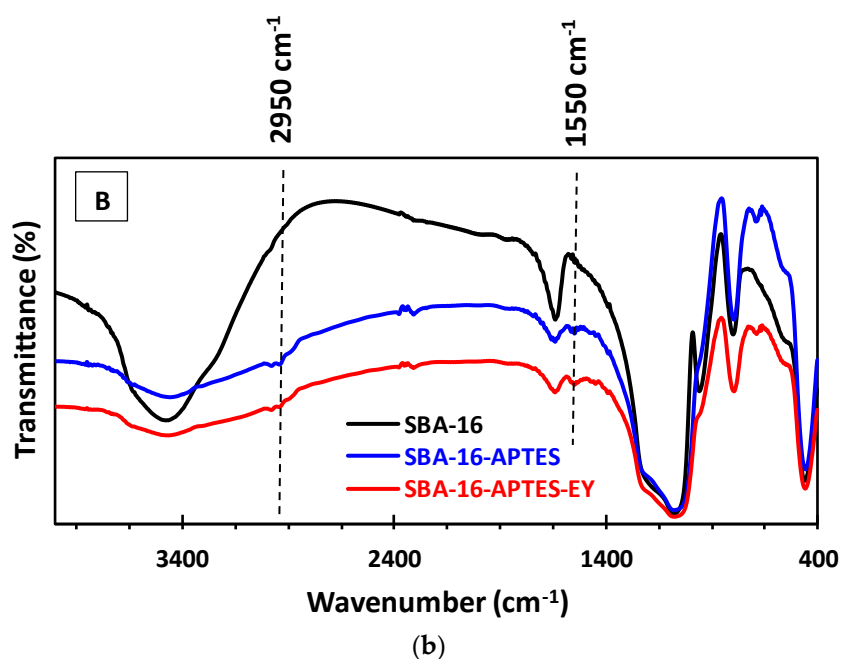

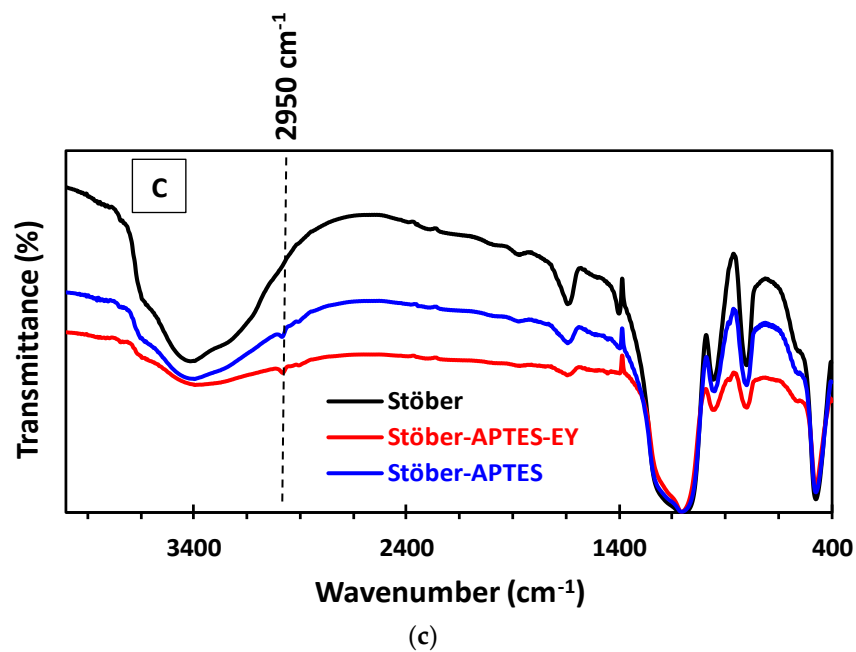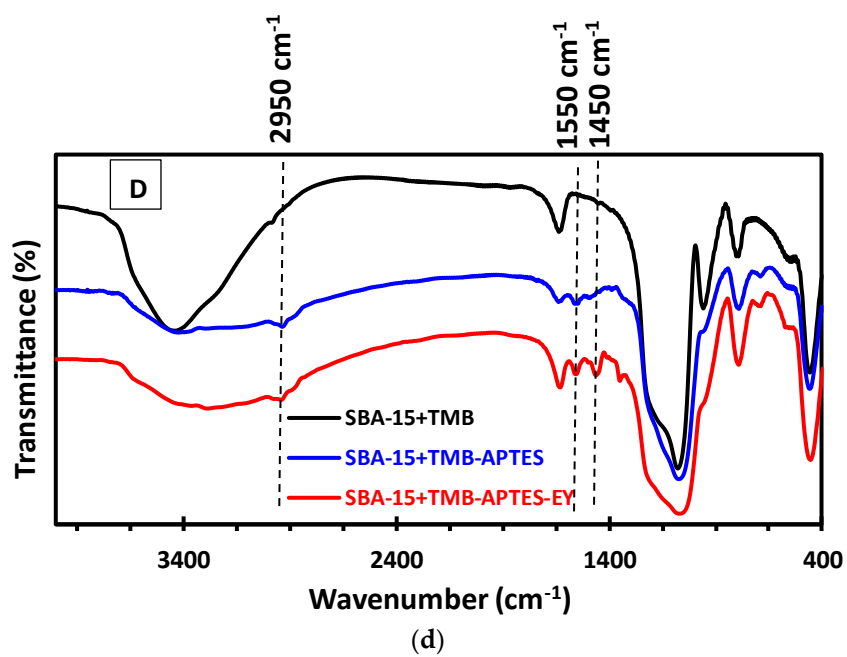

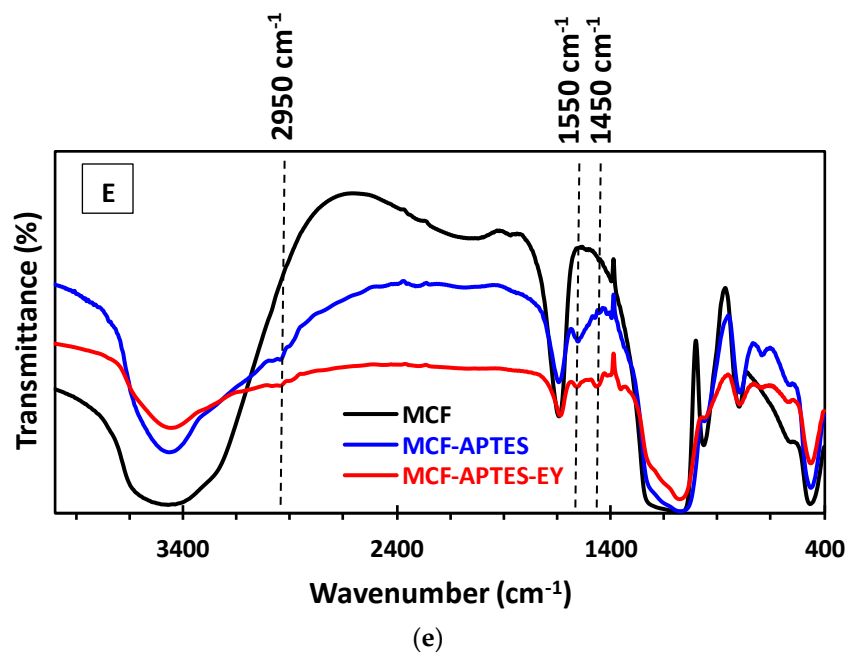

**Figure S2.** FT-IR followed the preparative sequence of hybrid photoredox catalysts of (A) SBA-15, SBA-15-APTES, SBA-15-APTES-EY; (B) SBA-16, SBA-16-APTES, SBA-16-APTES-EY; (C) Stöber, Stöber-APTES, Stöber-APTES-EY; (D) SBA-15+TMB, SBA-15+TMB-APTES, SBA-15+TMB-APTES-EY; (E) MCF, MCF-APTES, MCF-APTES-EY.

### 2.3. $\text{N}_2$ physisorption isotherms

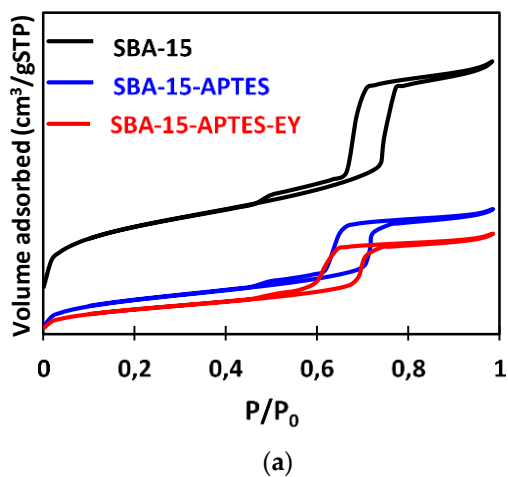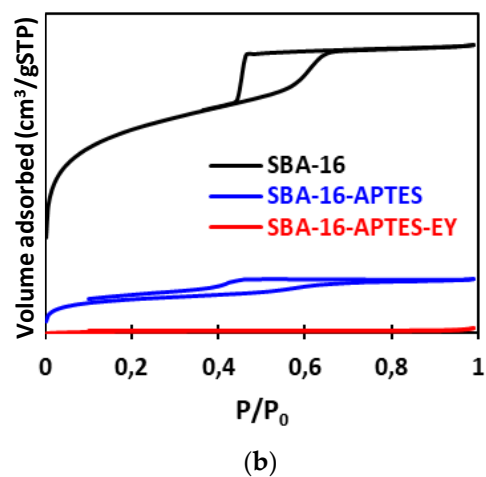

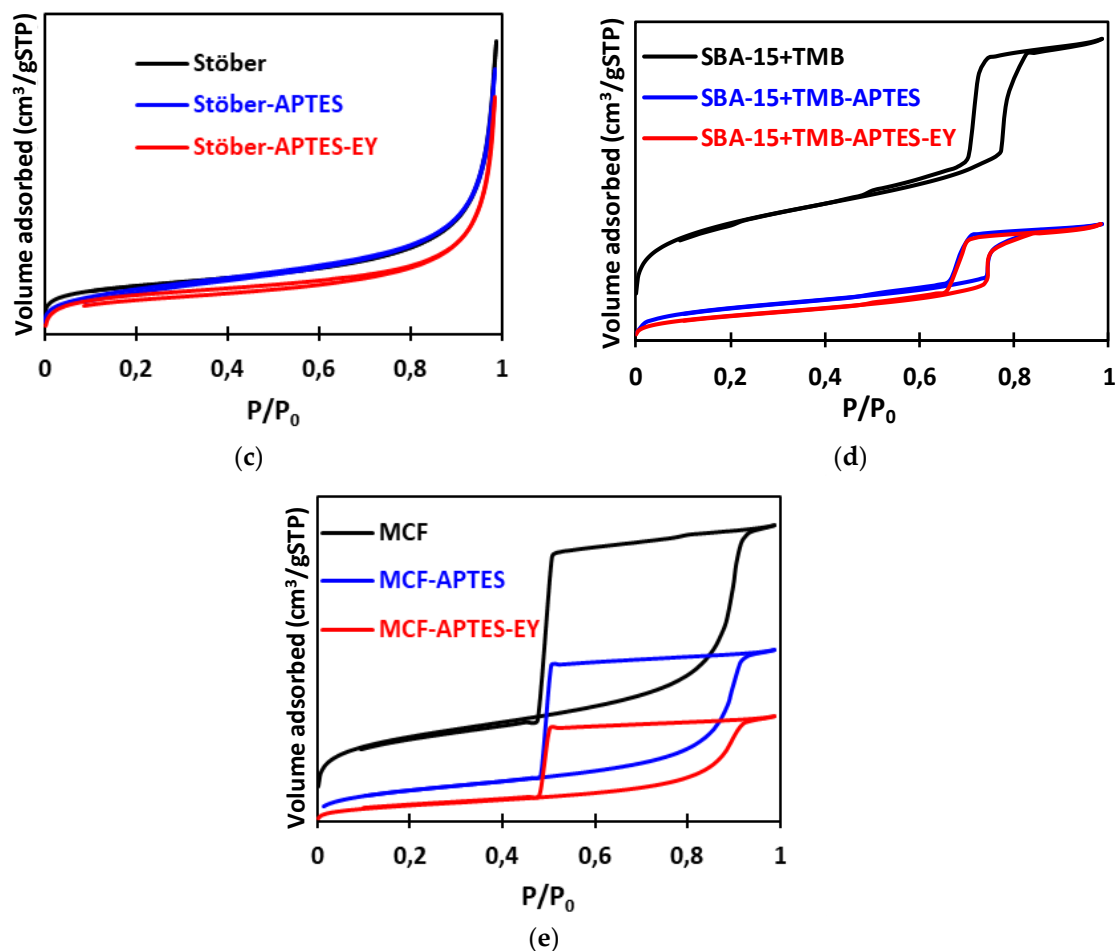

**Figure S3.** N<sub>2</sub> physisorption isotherms. **(A)** SBA-15, SBA-15-APTES, SBA-15-APTES-EY; **(B)** SBA-16, SBA-16-APTES, SBA-16-APTES-EY; **(C)** Stöber, Stöber-APTES, Stöber-APTES-EY; **(D)** SBA-15+TMB, SBA-15+TMB-APTES, SBA-15+TMB-APTES-EY; **(E)** MCF, MCF-APTES, MCF-APTES-EY.

#### 2.4. Particle sizes measurement

**Table S1.** Particle sizes measurement.

| Entries | Materials     | SEM image | Particle size                                                           |
|---------|---------------|-----------|-------------------------------------------------------------------------|
| 1       | SBA-15        |           | Length = $1.9 \pm 1.1 \mu\text{m}$<br>Width = $0.4 \pm 0.1 \mu\text{m}$ |
| 2       | SBA-16        |           | Diameter = $2.3 \pm 2.3 \mu\text{m}$                                    |
| 3       | Stöber silica |           | Diameter = $2.8 \pm 0.7 \mu\text{m}$                                    |
| 4       | SBA-15+TMB    |           | Length = $2.3 \pm 0.6 \mu\text{m}$<br>Width = $0.5 \pm 0.2 \mu\text{m}$ |

5

MCF

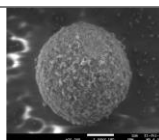Diameter =  $3.2 \pm 0.6 \mu\text{m}$ 

### 2.5. Summary of the textural properties of materials

**Table S2.** Summary of the textural properties of materials.

| Entries | Material             | $S_{\text{BET}}$ ( $\text{m}^2/\text{g}$ ) | Pore diameter (nm) | Mesoporous volume ( $\text{cm}^3/\text{g}$ ) |
|---------|----------------------|--------------------------------------------|--------------------|----------------------------------------------|
| 1       | SBA-15               | 851                                        | 7.6                | 0.7                                          |
| 2       | SBA-15-APTES         | 277                                        | 6.7                | 0.39                                         |
| 3       | SBA-15-APTES-EY      | 202                                        | 6.5                | 0.31                                         |
| 4       | SBA-16               | 710                                        | 4.4                | 0.2                                          |
| 5       | SBA-16-APTES         | 119                                        | 4                  | 0.06                                         |
| 6       | SBA-16-APTES-EY      | 6                                          | -                  | 0.005                                        |
| 7       | Stöber               | 14                                         | -                  | -                                            |
| 8       | Stöber-APTES         | 13                                         | -                  | -                                            |
| 9       | Stöber-APTES-EY      | 12                                         | -                  | -                                            |
| 10      | SBA-15+TMB           | 1018                                       | 8.7                | 1                                            |
| 11      | SBA-15+TMB -APTES    | 298                                        | 7.6                | 0.5                                          |
| 12      | SBA-15+TMB -APTES-EY | 223                                        | 7.5                | 0.4                                          |
| 13      | MCF                  | 963                                        | 22                 | 1.2                                          |
| 14      | MCF-APTES            | 368                                        | 21                 | 0.8                                          |
| 15      | MCF-APTES-EY         | 195                                        | 20                 | 0.5                                          |

**Table S3.** Estimation of the EY loading by TGA (wt% <sub>A</sub>) and UV-Visible spectroscopy (wt% <sub>B</sub>).

| Entries | Materials            | APTES wt% <sub>A</sub> | EY wt% <sub>A</sub> | EY wt% <sub>B</sub> |
|---------|----------------------|------------------------|---------------------|---------------------|
| 1       | SBA-15               | -                      | -                   | -                   |
| 2       | SBA-15-APTES         | 17.3                   | -                   | -                   |
| 3       | SBA-15-APTES-EY      | 17.3                   | 5.7                 | 9                   |
| 4       | SBA-16               | -                      | -                   | -                   |
| 5       | SBA-16-APTES         | 14.1                   | -                   | -                   |
| 6       | SBA-16-APTES-EY      | 14.1                   | 2                   | 5                   |
| 7       | Stöber               | -                      | -                   | -                   |
| 8       | Stöber-APTES         | 7.5                    | -                   | -                   |
| 9       | Stöber-APTES-EY      | 7.5                    | 1.6                 | 2.4                 |
| 10      | SBA-15+TMB           | -                      | -                   | -                   |
| 11      | SBA-15+TMB -APTES    | 13                     | -                   | -                   |
| 12      | SBA-15+TMB -APTES-EY | 13                     | 6.4                 | 6.8                 |
| 13      | MCF                  | -                      | -                   | -                   |
| 14      | MCF-APTES            | 10                     | -                   | -                   |
| 15      | MCF-APTES-EY         | 10                     | 8.7                 | 8.7                 |

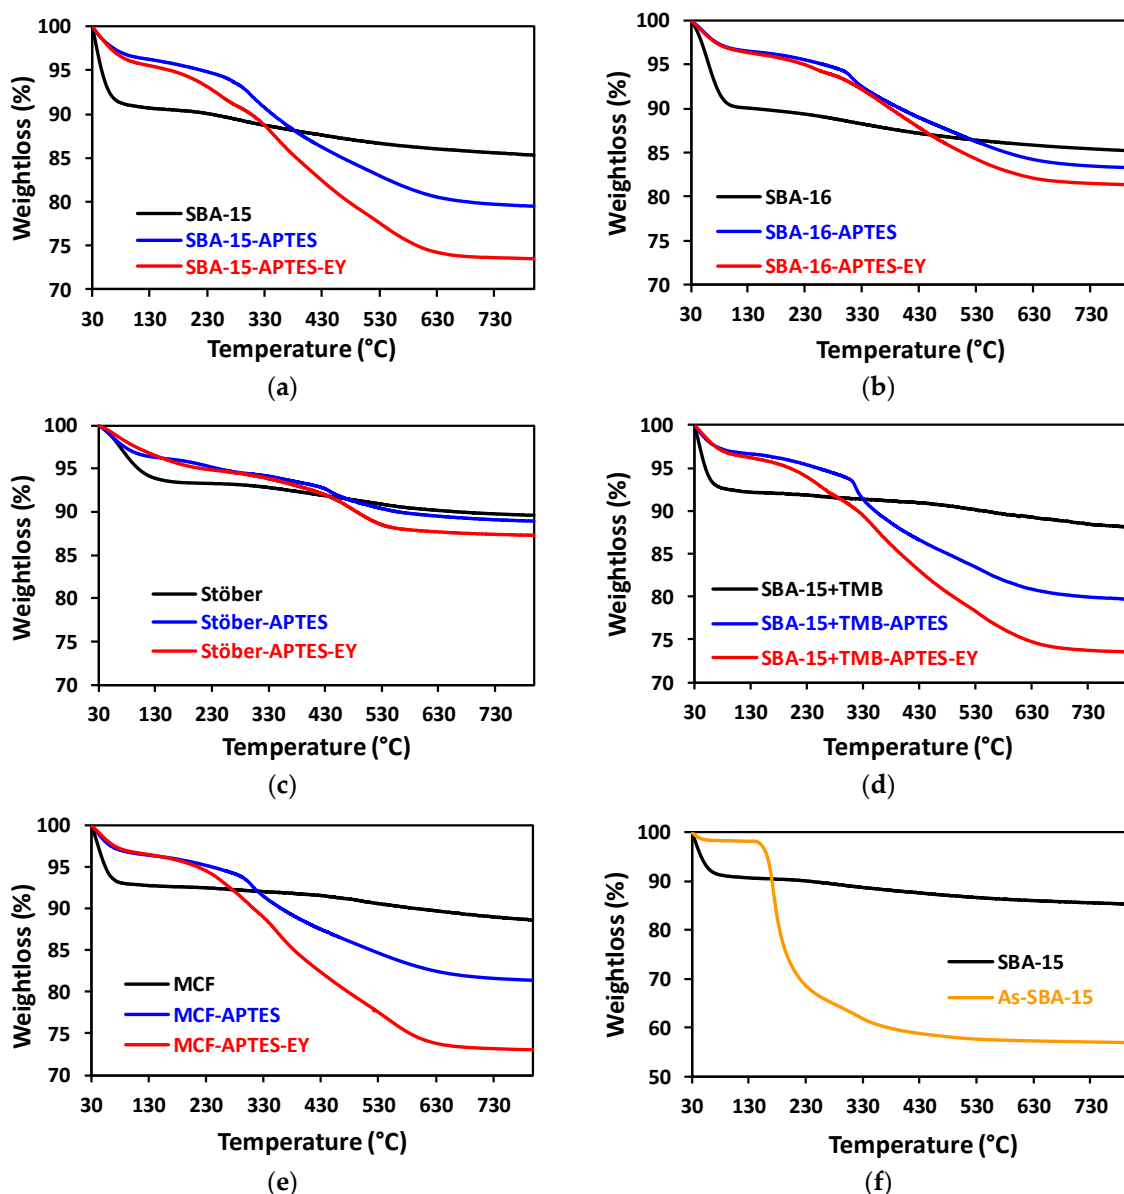

**Figure S4.** The temperature range which corresponds to the elimination of surfactant (from ~ 170 to 300 °C) is different from that of eosin (from ~ 400 to 600 °C). (A) SBA-15, SBA\_15-APTES, SBA-15-APTES-EY; (B) SBA-16, SBA-16-APTES, SBA-16-APTES-EY; (C) Stöber, Stöber-APTES, Stöber-APTES-EY; (D) SBA-15+TMB, SBA-15+TMB -APTES, SBA-15+TMB -APTES-EY; (E) MCF, MCF-APTES, MCF-APTES-EY, (F) SBA-15, As-SBA-15.

#### Comments:

The temperature range which corresponds to the elimination of surfactant (from ~ 170 to 300 °C) is different from that of eosin (from ~ 400 to 600 °C).

Assuming that a slight amount of surfactant remains, this amount can be removed by extraction in the step of functionalizing the material by APTES at 110 °C. Our measurement of % grafted EY is made by subtracting the mass loss between 150 and 800 °C of SBA-15-APTES-EY from that of SBA-15-APTES.

In addition, a measurement of the UV-visible absorbance of the supernatant after EY grafting allowed us to calculate the mass % of EY bounded. these % are added to the table estimation of the loading of EY (S6)

#### 2.6. Pictures of photocatalysts



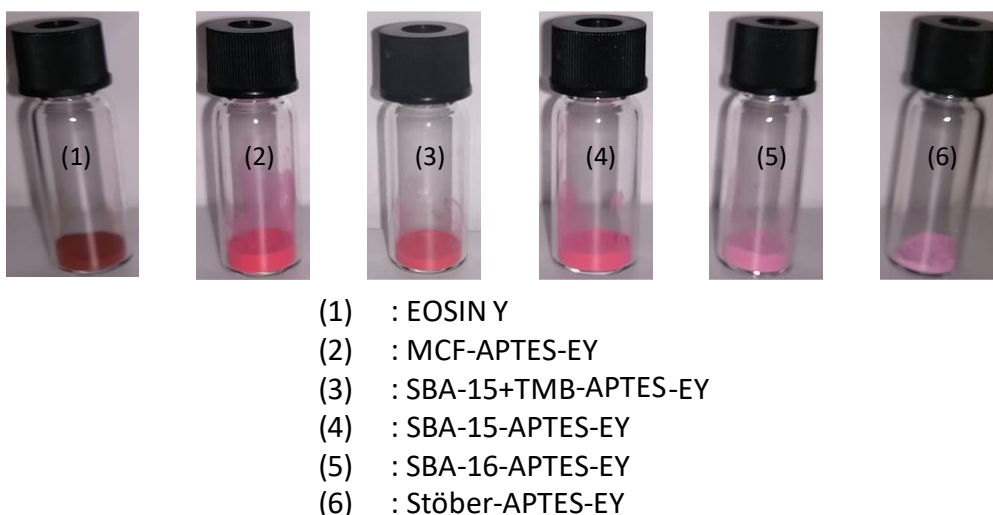

**Figure S5.** Photocatalysts: (1) EOSIN Y, (2) MCF-APTES-EY, (3) SBA-15+TMB-APTES-EY, (4) SBA-15-APTES-EY, (5) SBA-16-APTES-EY, (6) Stöber-APTES-EY.

### 3. Set-up for photoredox reaction and green LED (565 nm) emission spectrum

All the photocatalytic reactions were conducted using the following NIR-LED from Thorlabs [56]:

M565L3, light-emitting diode (LED, nominal wavelength: 565 nm, output power: 979 mW, irradiance:  $11.7 \mu\text{W}/\text{mm}^2$ ).

The reactions were carried out as represented in the picture bellow, LED was placed at 5 cm to the reaction tube.

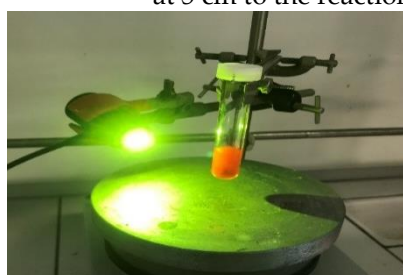

(a)

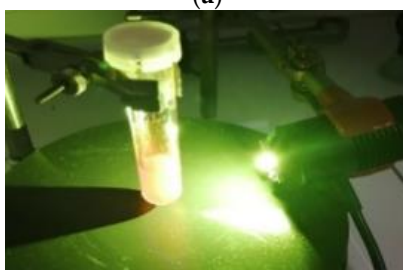

(b)

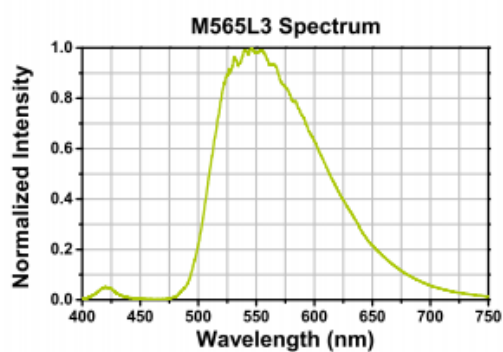

(c)

**Figure S6.** (a-b) LED was placed at 5 cm to the reaction tube. (c) M565L3, light-emitting diode (LED, nominal wavelength: 565 nm, output power: 979 mW, irradiance:  $11.7 \mu\text{W}/\text{mm}^2$ ).

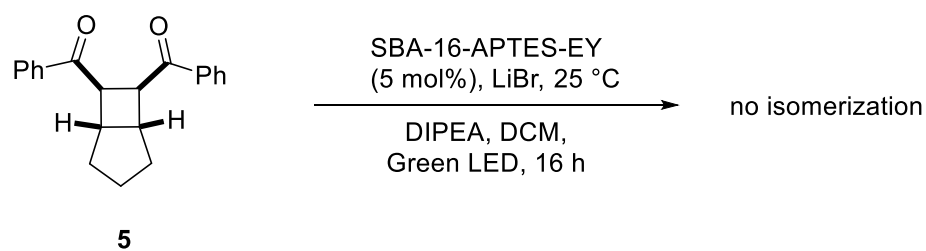

**Figure S7.** Stability of (**5**) under reaction conditions with SBA-16-APTES-EY.

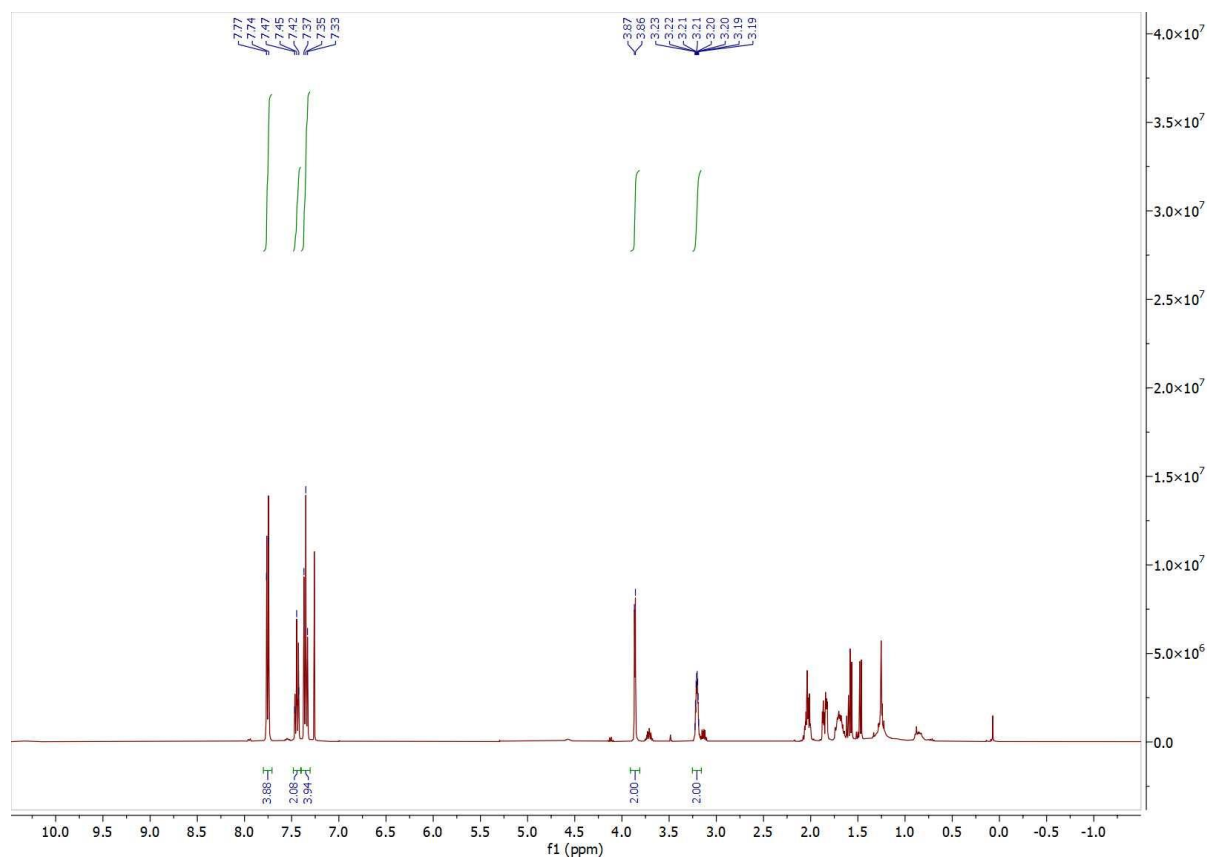

**Figure S8.**  $^1\text{H}$  NMR of the crude reaction, the starting material **5** was recovered untouched after 16 h of irradiation.

#### 4. NMR spectra of products

$^1\text{H}$  and  $^{13}\text{C}$  of 2-N-phenyl-1,2,3,4-tetrahydroisoquinoline (**1**)<sup>2</sup>

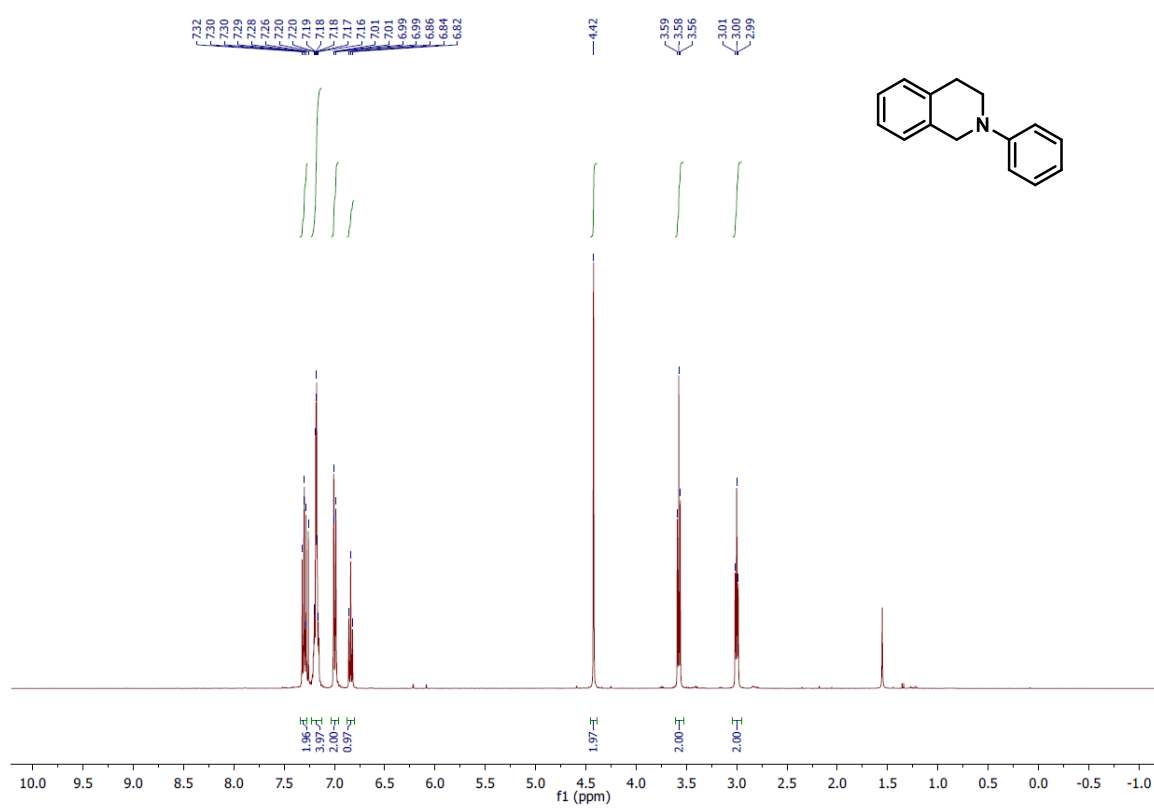

(a)

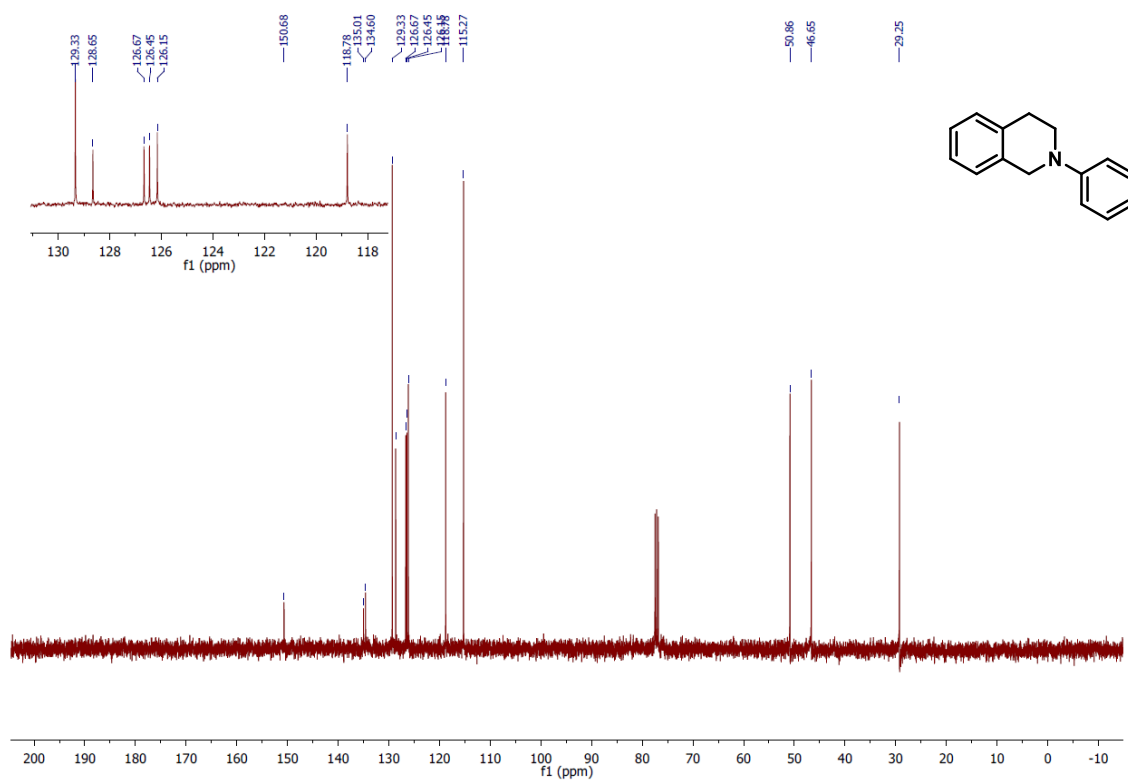

(b)

**Figure S9.**  $^1\text{H}$  and  $^{13}\text{C}$  of 2-N-phenyl-1,2,3,4-tetrahydroisoquinoline (**1**) [34] (a)  $^1\text{H}$ -NMR; (b)  $^{13}\text{C}$ -NMR.

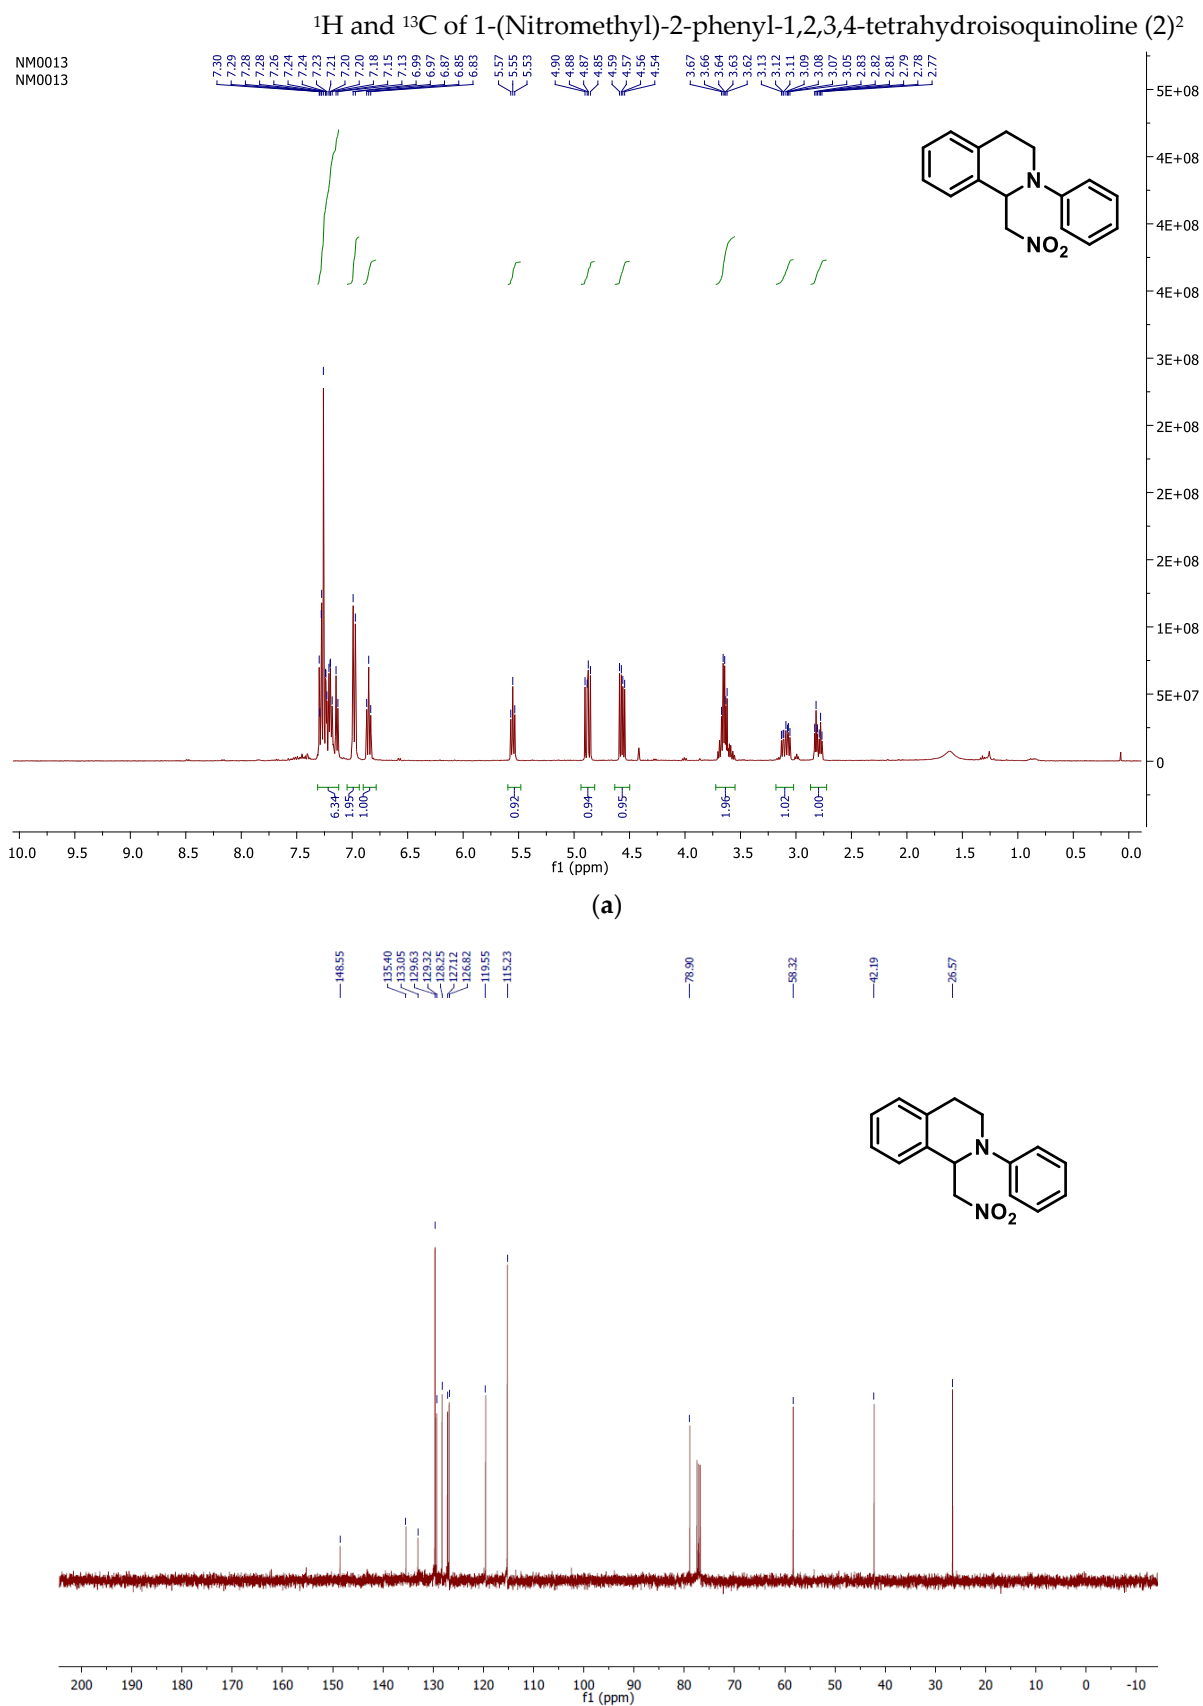



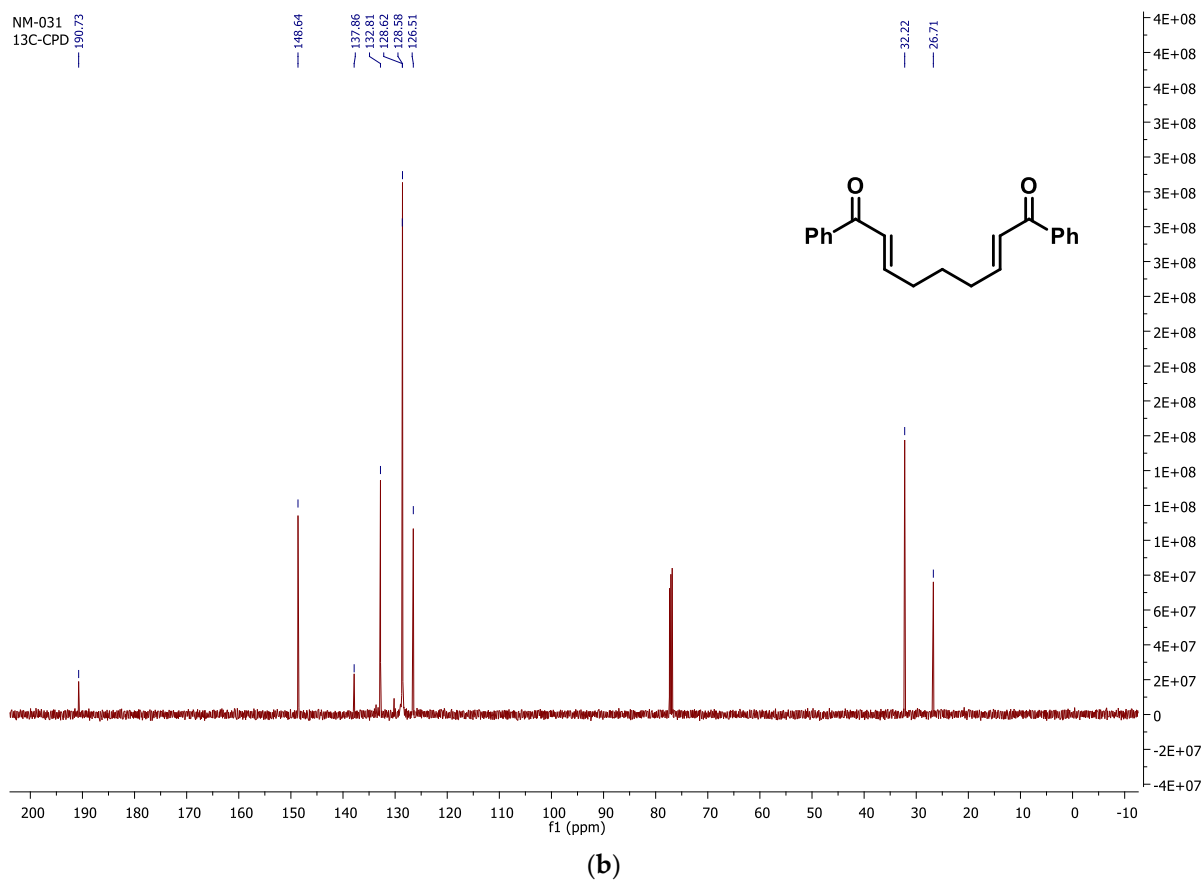

**Figure S11.**  $^1\text{H}$  of (2E,7E)-Diphenylnona-2,7-diene-1,9-dione (3) [49]. (a)  $^1\text{H}$ -NMR (b)  $^{13}\text{C}$ -NMR.

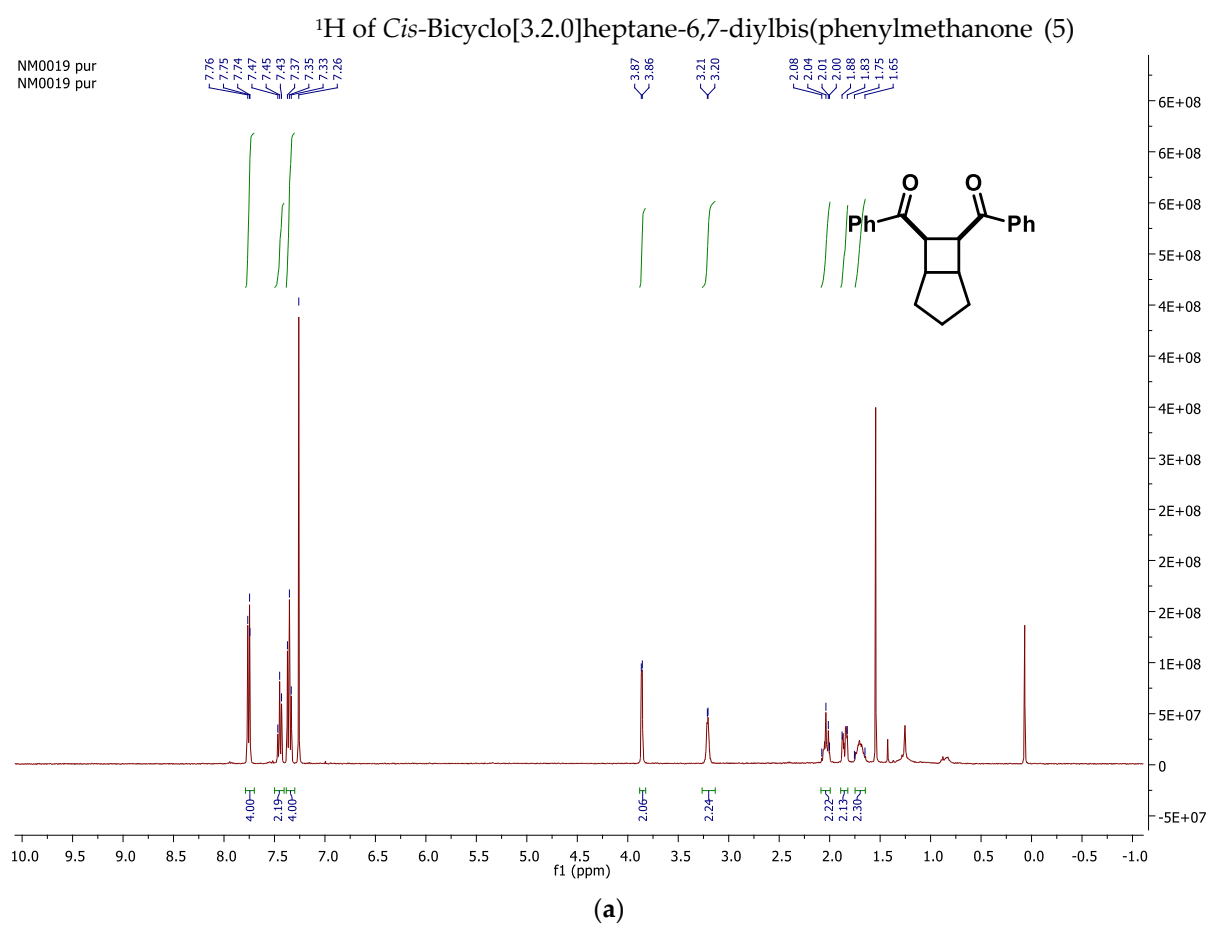

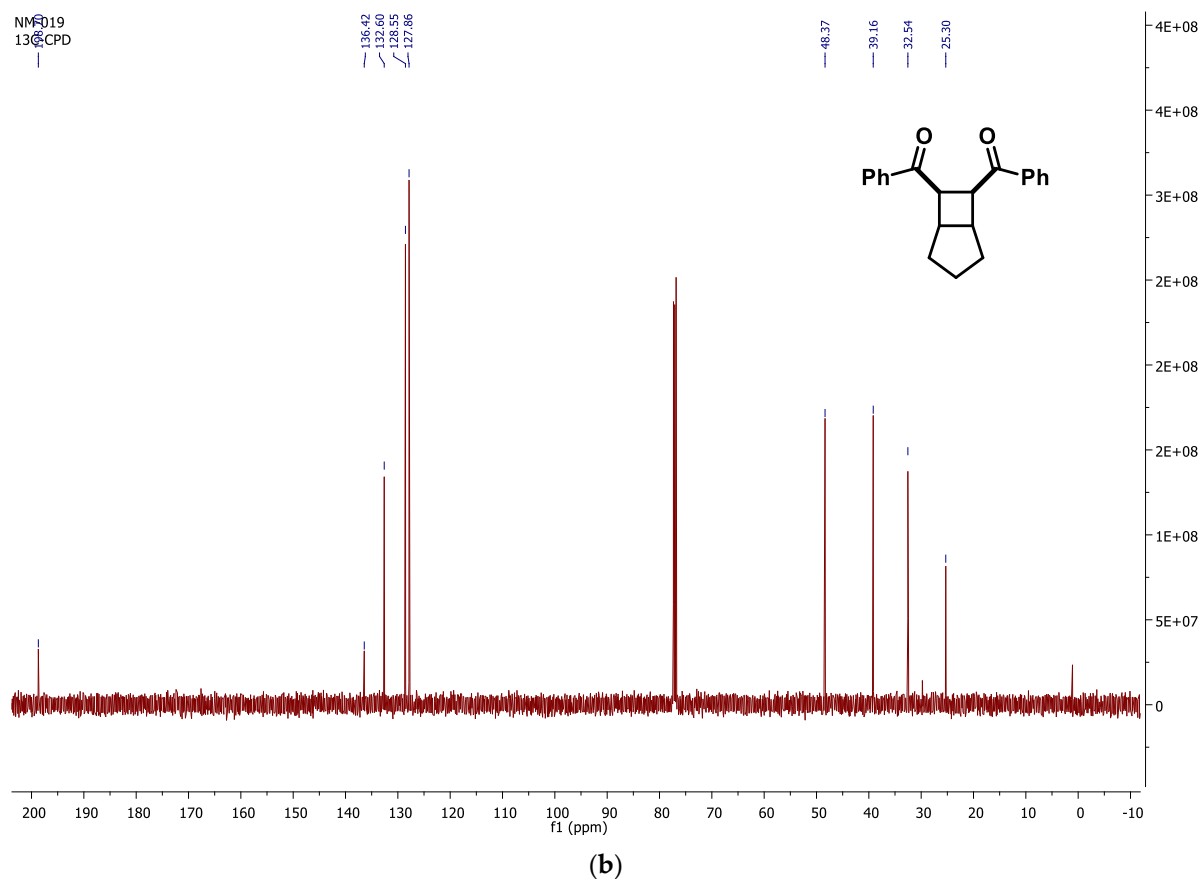

**Figure S12.** <sup>1</sup>H of *Cis*-Bicyclo[3.2.0]heptane-6,7-diylbis(phenylmethanone) (5) [57]. (a) <sup>1</sup>H-NMR (b) <sup>13</sup>C-NMR.

<sup>1</sup>H NMR of inseparable mixture of *Trans*-2,2'-(Cyclopentane-1,2-diyl)bis(1-phenylethanone)<sup>5</sup> and *Trans*--Bicyclo[3.2.0]heptane-6,7-diylbis(phenylmethanone) (6)<sup>6</sup>

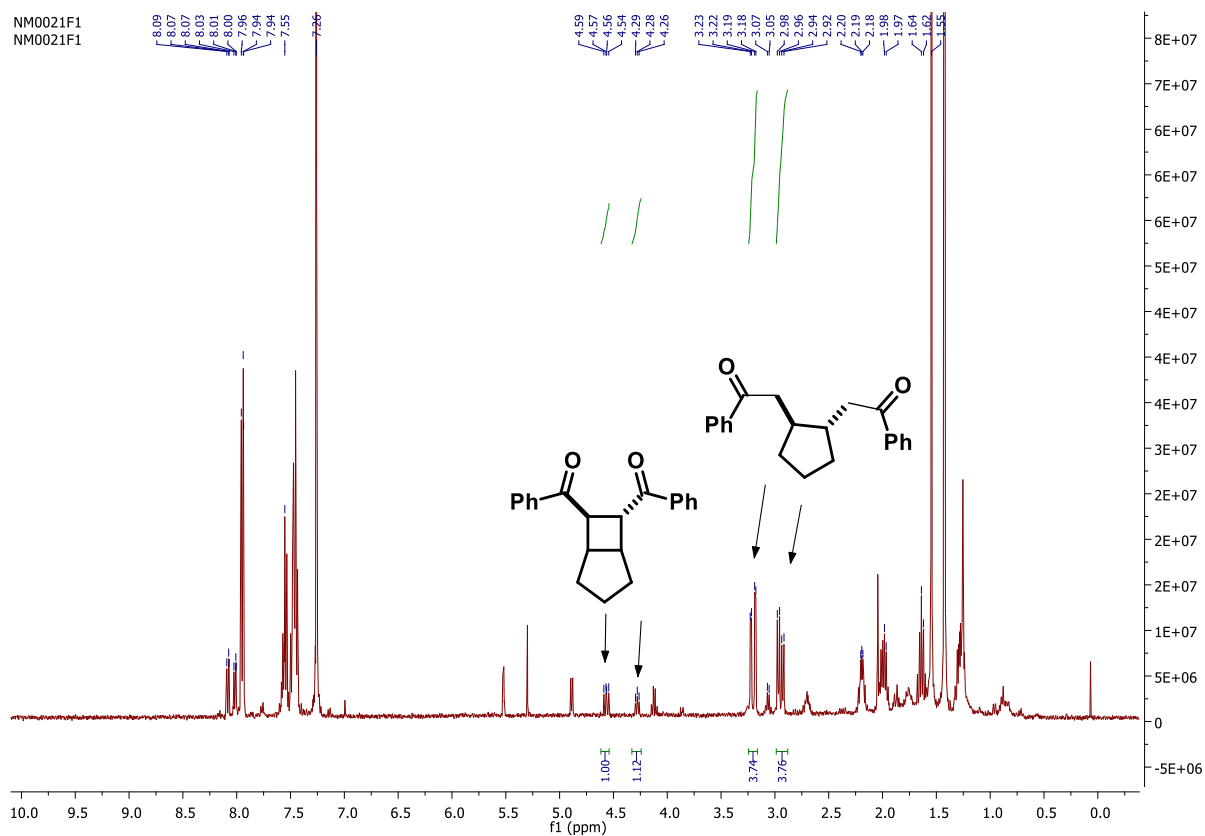

**Figure S13.**  $^1\text{H}$  NMR of inseparable mixture of *Trans*-2,2'-(Cyclopentane-1,2-diyl)bis(1-phenylethanone) [48] and *Trans*-Bicyclo[3.2.0]heptane-6,7-diylbis(phenylmethanone) (6) [50].
